# Supplementary material for: Insight into the dehydration of high-concentration fructose to 5-hydroxymethylfurfural in oxygen-containing polar aprotic solvents
Source: Royal Society of Chemistry journal article supplement (doi:10.1039/d2nj01339h), 2022-01-01
Supplement: d2nj01339h1.pdf [file d2nj01339h1.pdf]

## **Insight into the Dehydration of High-concentration Fructose to 5-Hydroxymethylfurfural in Oxygen-containing Polar Aprotic Solvents**

Zuojun Wei, En Yao, Yuran Cheng, Jinbo Hu, and Yingxin Liu\*

College of Pharmaceutical Science, Zhejiang University of Technology, 1 GongDa Road, Wukang Street, Deqing County, HuZhou 313200, P.R. China.

Email: yxliu@zjut.edu.cn

## Table of contents

- Fig. S1 Liquid chromatogram of 5-HMF and fructose
- Fig. S2 Effect of water content on 5-HMF yield for 1 wt% and 20 wt% fructose concentration
- Fig. S3 Effect of mixed solvent on 5-HMF yield in different fructose concentrations
- Fig. S4 Mass spectrum of unknown intermediate in reaction products (RT. at 10.85 and 11.52 min)
- Fig. S5 Molecular isomers of fructose and their acid catalyzed dehydration to 5-HMF and DFAs
- Fig. S6 Various pathways of the growth of humins via 5-HMF
- Fig. S7  $^{13}\text{C}$ -NMR of D-fructose in DMSO- $d_6$ , EGDE:water (8:2), DIO:water (9:1), THF:water (8:2), ACE:water (8:2),  $\text{D}_2\text{O}$  and EGME:water (9:1) at 25 °C
- Table S1 Peak area of DFAs and fructose
- Table S2 Tautomer distributions for fructose in various solvents at room temperature

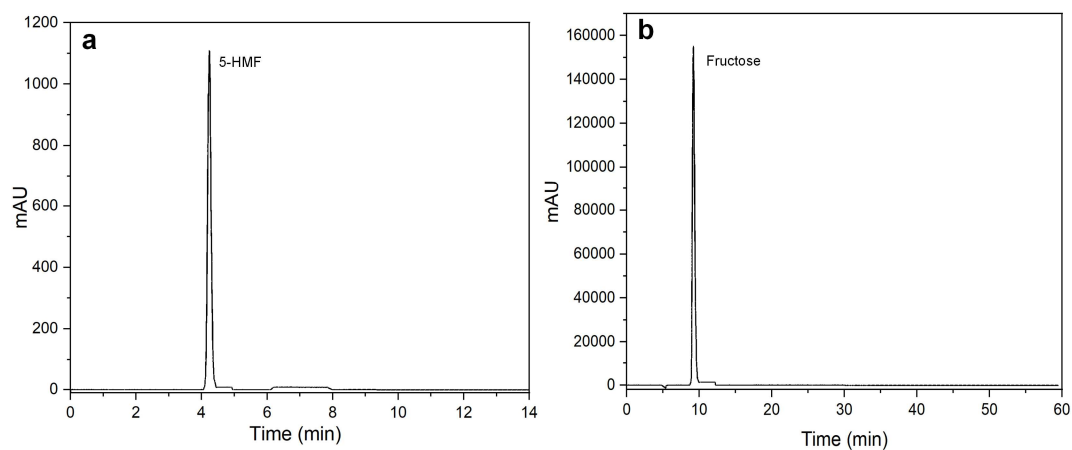

Fig. S1 Liquid chromatogram of a: 5-HMF and b: fructose.

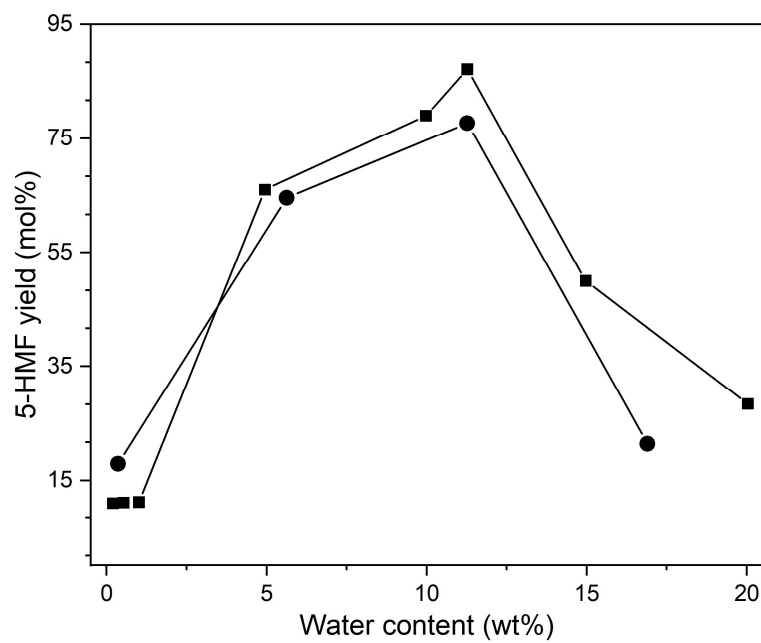

Fig. S2 Effect of water content on 5-HMF yield for 1 wt% and 20 wt% fructose concentration. Reaction conditions: ■: 1 wt% fructose concentration, ●: 20 wt% fructose concentration,  $n(\text{HCl})/n(\text{fructose}) = 3.6\%$ , 6.1 g 1,4-dioxane, 140 °C, 30 min, rotate speed: 1000 rpm.

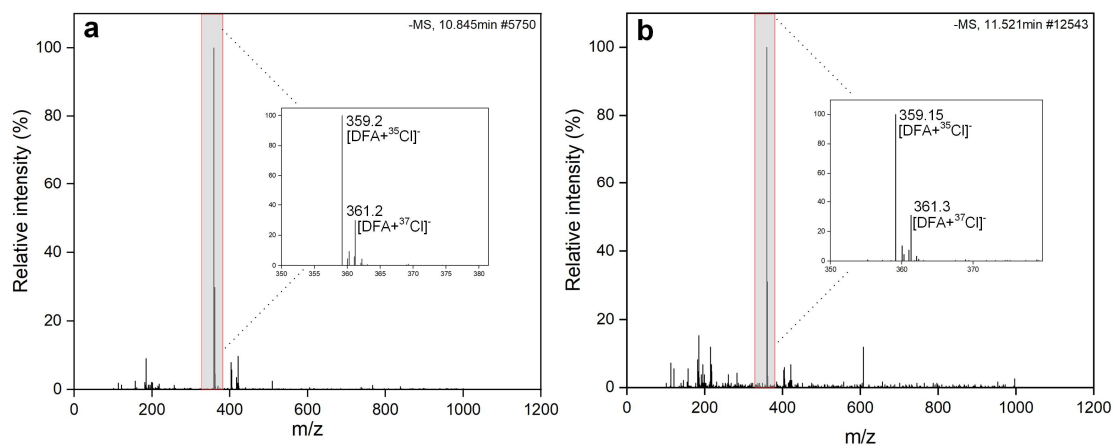

Fig. S4 Mass spectrum of unknown intermediate in reaction products a: RT. at 10.85 min and b: RT. at 12.20 min.

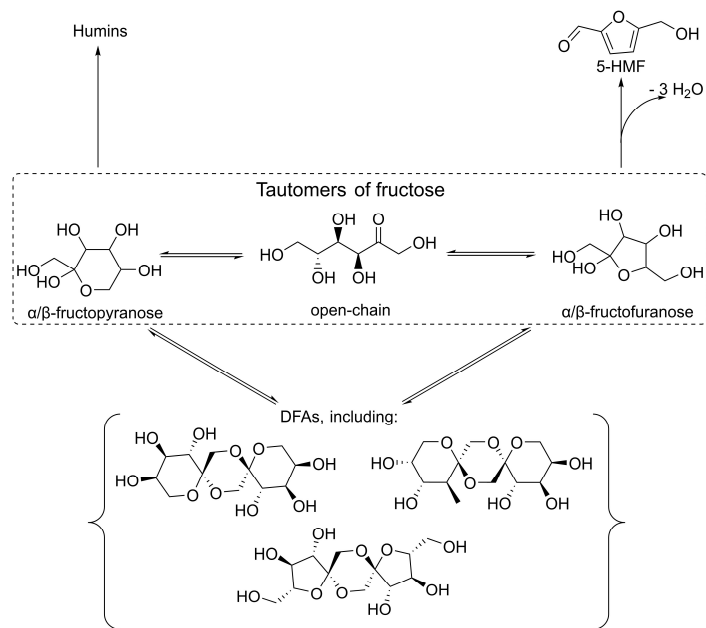

Fig. S5 Molecular isomers of fructose and their acid catalyzed dehydration to 5-HMF and DFAs.

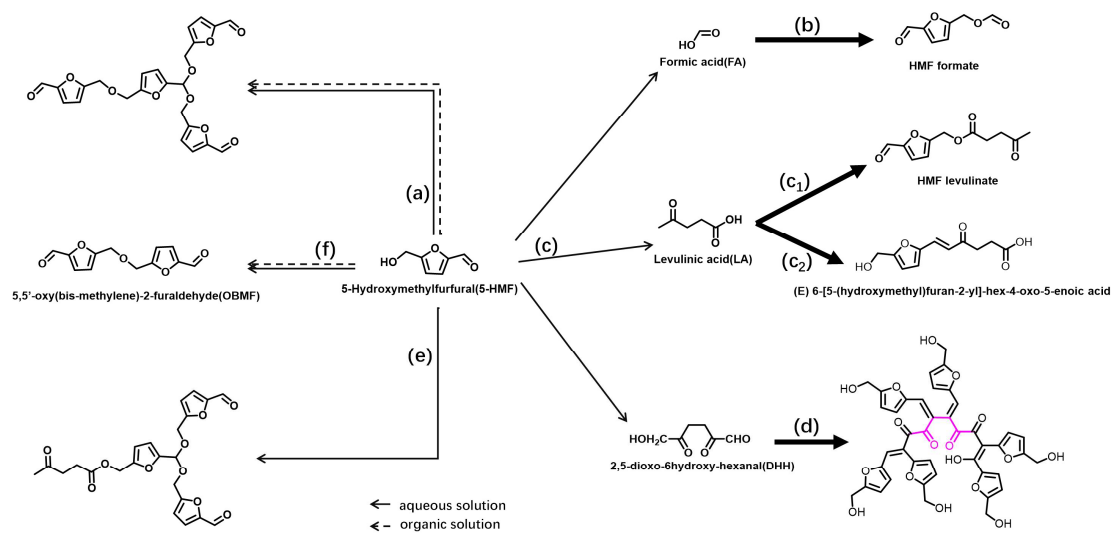

Etherification: (a), (f); Acetalization: (a), (e); Esterification: (b), (c<sub>1</sub>), (e); Aldol addition/condensation: (c<sub>2</sub>), (d).

Fig. S6 Various pathways of the growth of humins via 5-HMF.<sup>1,2</sup>

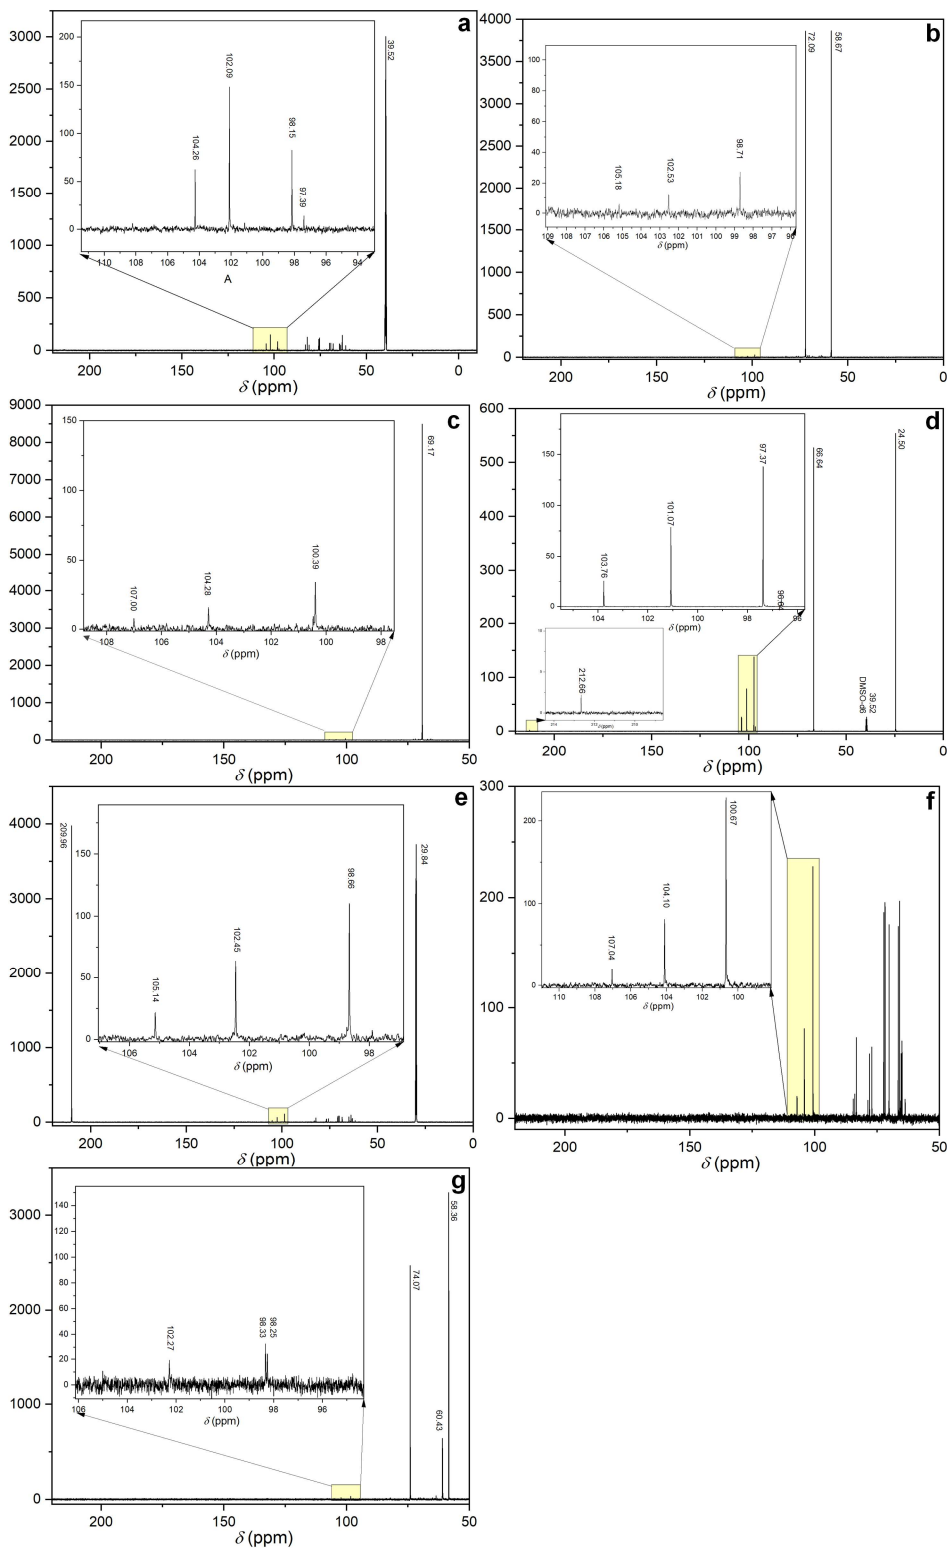

Fig. S7  $^{13}\text{C}$ -NMR of D-fructose in a: DMSO- $d_6$ , b: EGDE:water (8:2), c: DIO:water (9:1), d: THF:water (8:2), e: ACE:water (8:2), f:  $\text{D}_2\text{O}$ , g: EGME:water (9:1) at 25 °C. Note: The addition of water is to make 20 mg of fructose be fully dissolved for NMR detection. For THF:water (8:2) mixture, only 10 mg fructose is soluble. We therefore used isotopic 2- $^{13}\text{C}$ -labeled D-fructose instead to obtain satisfactory NMR signal.

Table S1 Peak area of DFAs and fructose

| Reaction | HPLC Peaks                |               |              |               |              |               |                              |              |               |
|----------|---------------------------|---------------|--------------|---------------|--------------|---------------|------------------------------|--------------|---------------|
|          | DFA1                      |               | DFA2         |               | DFA3         |               | Area sum<br>of DFAs<br>(mAU) | Fructose     |               |
|          | R.T <sup>b</sup><br>(min) | Area<br>(mAU) | R.T<br>(min) | Area<br>(mAU) | R.T<br>(min) | Area<br>(mAU) |                              | R.T<br>(min) | Area<br>(mAU) |
| 7        | 10.32                     | 8680          | 10.90        | 30608         | 11.58        | 333           | 39621                        | 12.22        | 880899        |
| 9        | 10.38                     | 130796        | 10.89        | 10692         | 11.53        | 6398          | 147886                       | 12.22        | 824400        |
| 11       | 10.39                     | 260711        | 10.85        | 256134        | 11.53        | 74512         | 591357                       | 12.26        | 320102        |
| 13       | 10.38                     | 495577        | 10.84        | 600081        | 11.59        | 88333         | 1183991                      | 12.25        | 87721         |
| 15       | 10.32                     | 6805          | 10.90        | 6104          | 11.58        | 769           | 13678                        | 12.22        | 52342         |

<sup>a</sup> R.T: retention time.

Table S2 Tautomer distributions of fructose in various solvents at room temperature

| Entry | Solvent             | Fructofuranose    | Fructopyranose    | Open chain       | 5-HMF yield (%) | References |
|-------|---------------------|-------------------|-------------------|------------------|-----------------|------------|
| 1     | D <sub>2</sub> O    | 32.7              | 67.3              | trace            | 19.0            | This work  |
| 2     | EGME (9:1)          | 27.9              | 72.1              | trace            | 61.4            | This work  |
| 3     | ACE (8:2)           | 43.0              | 57.0              | trace            | 71.5            | This work  |
| 4     | DIO (9:1)           | 38.4              | 61.5              | trace            | 77.7            | This work  |
| 5     | EGDE (8:2)          | 45.9              | 54.1              | trace            | 74.1            | This work  |
| 6     | THF (8:2)           | 47.0              | 52.1              | 0.9              | 78.3            | This work  |
| 7     | DMSO                | 69.0              | 31.0              | trace            | 80.3            | This work  |
| 1a    | H <sub>2</sub> O    | 25.6              | 74.4              | trace            | 28.0            | Ref. 3     |
| 1b    | D <sub>2</sub> O    | 29.3              | 70.0              | 0.7              | NM.             | Ref. 4     |
| 4a    | ACE (9:1)           | 47.7              | 52.3              | trace            | 76.2            | Ref. 3     |
| 6a    | THF 4:1)            | 33.0              | 66.0              | 1.0              | 58.5            | Ref. 4     |
| 6b    | THF (4:1)           | 44.7 <sup>b</sup> | 52.1 <sup>b</sup> | 3.2 <sup>b</sup> | 74.4            | Ref. 4     |
| 7a    | DMSO (9:1)          | 53.0              | 45.3              | 1.7              | 91.0            | Ref. 4     |
| 7b    | DMSO-d <sub>6</sub> | 65.6              | 32.0              | 2.4              | 80.0            | Ref. 5     |
| 7c    | DMSO-d <sub>6</sub> | 64.0              | 36.0              | trace            | NM.             | Ref. 6     |
| 7d    | DMSO-d <sub>6</sub> | 68.3              | 31.7              | trace            | NM.             | Ref. 3     |
| 8     | DHMTHF (9:1)        | 37.7              | 60.50             | 1.8              | 60.9            | Ref. 4     |
| 9     | DMF                 | 56.0              | 43.0              | trace            | 92.6            | Ref. 7     |
| 10    | GVL (20:3)          | 38.3              | 61.7              | trace            | 69.0            | Ref. 8     |
| 11    | ethanol (9:1)       | 48.3              | 50.6              | 1.1              | 53.3            | Ref. 4     |
| 11a   | ethanol (9:1)       | 46.3 <sup>b</sup> | 51.0 <sup>b</sup> | 2.7 <sup>b</sup> | 47.5            | Ref. 4     |
| 12    | THFA (9:1)          | 33.1              | 58.4              | 1.5              | 54.3            | Ref. 4     |

<sup>a</sup> NM: Not mentioned. <sup>b</sup> Detected at 60 °C

Reaction conditions:

Tucker's research<sup>4</sup>: 2 wt% fructose, Amberlyst 70 catalyst, 130 °C, THF: 6a: 20 min; 6b: 35 min; DMSO: 7a: 32 min; 2,5-(dihydroxymethyl)tetrahydrofuran:water (9:1 v:v): 8: 35 min; ethanol (9:1 v:v): 11: 30 min, 11a: 20 min; THFA (9:1 v:v): 12: 20 min.

Bicker's research<sup>3</sup>: 1 wt% fructose, 10 mmol/L H<sub>2</sub>SO<sub>4</sub>, 180 °C, water: 1a: 25 MPa, 600 s; acetone: 4a: 20 MPa, 120 s.

Liu's research<sup>7</sup>: 5.5wt% fructose, mixed acid catalyst (H<sub>2</sub>SO<sub>4</sub>/H<sub>3</sub>PO<sub>4</sub> = 1.0, AlCl<sub>3</sub>/(H<sub>2</sub>SO<sub>4</sub>+H<sub>3</sub>PO<sub>4</sub>) = 0.22), DMF 9: 120 °C, 20min.

Qi's research<sup>8</sup>: 3 wt% fructose, 0.075 mL H<sub>2</sub>SO<sub>4</sub> (5mol/L), 0.5 mL GVL 10: 130 °C, 2 min.

Akien's research<sup>5</sup>: 9 wt% fructose, 0.01 mol/L H<sub>2</sub>SO<sub>4</sub>, 0.5 mL DMSO, 7b:120 °C, 120 min.

## References:

1. S. K. R. Patil and C. R. F. Lund, *Energy Fuels*, 2011, **25**, 4745-4755.
2. H. Shen, H. Shan and L. Liu, *ChemSusChem*, 2020, **13**, 513-519.
3. M. Bicker, D. Kaiser, L. Ott and H. Vogel, *J. Supercrit. Fluids*, 2005, **36**, 118-126.
4. M. H. Tucker, R. Alamillo, A. J. Crisci, G. M. Gonzalez, S. L. Scott and J. A. Dumesic, *ACS Sustainable Chem. Eng.*, 2013, **1**, 554-560.
5. G. R. Akien, L. Qi and I. T. Horvath, *Chem. Commun.*, 2012, **48**, 5850-5852.
6. F. W. Lichtenthaler and S. Rönninger, *J. Chem. Soc., Perkin Trans. 2*, 1990, 1489-1497.
7. Y. X. Liu, Z. B. Li, Y. Yang, Y. X. Hou and Z. J. Wei, *RSC Adv.*, 2014, **4**, 42035-42038.
8. L. Qi and I. T. Horváth, *ACS Catal.*, 2012, **2**, 2247-2249.
